# Supplementary material for: Gene-by-Temperature Interactions and Candidate Plasticity Genes for Morphological Traits in Drosophila melanogaster
Source: PubMed Central journal article supplement (PMC3728209; doi:10.1371/journal.pone.0070851), 2013-07-30
Supplement: pone.0070851.s005.pdf [file pone.0070851.s005.pdf]

**Table S1. Lines in which the *P*-element insertion affected one or more morphological traits in either sex at 17°C.**

| Line    | Candidate Gene                                          | <i>p</i> [ <i>GT1</i> ] insertion        | Cytogenetic map | Face Width |    | Head Width |    | Thorax Length |    | Wing Size |     | Wing Shape |    |
|---------|---------------------------------------------------------|------------------------------------------|-----------------|------------|----|------------|----|---------------|----|-----------|-----|------------|----|
|         |                                                         |                                          |                 | ♂          | ♀  | ♂          | ♀  | ♂             | ♀  | ♂         | ♀   | ♂          | ♀  |
| BG00369 | <i>CG13333 / CG13334</i>                                | 671 bp at 3' side /<br>532 bp at 5' side | 50B1            | ns         | ▼  | ns         | ▼  | ns            | ▼  | ▲         | ns  | S          | S  |
| BG00373 | <i>jim</i>                                              | 303 bp at 5' side                        | 80A4            | ns         | ▼  | ▼          | ▼  | ▼             | ▼  | ns        | ▼   | S*         | S* |
| BG00386 | <i>NMDA receptor 1</i><br>( <i>Nmdar1</i> )             | 348 bp at 3' side                        | 83A6-A7         | ns         | ▼  | ns         | ▼  | ns            | ▼  | ns*       | ▼   | S*         | S  |
| BG00524 | <i>tal-1A</i>                                           | 647 bp at 5' side                        | 87F14           | ns         | ns | ns         | ns | ns            | ▼  | ▲         | ns  | ns*        | S* |
| BG00737 | <i>Heat shock protein 27</i><br>( <i>Hsp 27</i> )       | 127 bp at 5' side                        | 67B3            | ns*        | ▼  | ▼          | ▼  | ▼             | ▼  | ns        | ns  | S*         | S  |
| BG00930 | No sequence                                             |                                          |                 | ns         | ▼  | ▼          | ▼  | ▼             | ▼  | ns        | ▼   | ns         | S* |
| BG00992 | <i>CG17574</i>                                          | In gene (intron)                         | 49D4-49D6       | ns         | ns | ns         | ns | ns            | ns | ▲         | ns  | ns         | S  |
| BG01011 | <i>Spinophilin (Spn)</i>                                | 33 bp at 5' side                         | 62E6-E7         | ns         | ▼* | ▼          | ▼* | ▼             | ▼* | ns*       | ns* | ns*        | S* |
| BG01014 | <i>Spichthyin (spict)</i>                               | In gene (exon)                           | 33F3            | ▲          | ns | ns         | ns | ns            | ns | ▲         | ns  | S*         | S* |
| BG01028 | <i>Trithorax-like (Trl)</i>                             | In gene (intron)                         | 70F4            | ns         | ▼  | ns         | ▼  | ns            | ▼  | ▲         | ns  | S*         | S* |
| BG01081 | <i>Glutamate oxaloacetate<br/>transaminase 1 (Got1)</i> | In gene (exon-intron)                    | 52E7-E10        | ns         | ▼  | ns         | ▼  | ns            | ▼  | ns        | ns  | S*         | S  |
| BG01214 | <i>sugarless (sgl)</i>                                  | In gene (5'UTR)                          | 65D4-D5         | ns         | ▼  | ns         | ▼  | ▼             | ▼  | ns        | ns  | S*         | S  |
| BG01218 | <i>CG6767</i>                                           | In gene (intron)                         | 67C4-C5         | ns         | ▼  | ▼          | ▼  | ▼             | ▼  | ns        | ns  | ns*        | S* |
| BG01290 | <i>Btk family kinase at 29A</i><br>( <i>Btk29A</i> )    | In gene (intron)                         | 29A1-A3         | ns         | ▼  | ns         | ▼  | ▼             | ▼  | ns        | ▼   | ns*        | S  |
| BG01339 | <i>cricketlet (clt)</i>                                 | In gene (5'UTR)                          | 57F4            | ns         | ▼  | ns         | ▼  | ns            | ▼  | ns        | ns  | S          | S  |
| BG01354 | <i>CG43340</i>                                          | 694 bp at 5' side                        | 43E6-E7         | ns         | ▼  | ns         | ▼  | ns            | ▼  | ▲         | ns  | S*         | S* |
| BG01488 | No similarity found                                     |                                          |                 | ns         | ▼  | ns         | ▼  | ns            | ▼  | ns        | ns  | S          | S  |

(Continued)

**Table 1 continued**

|         |                                                    |                                                               |          |     |    |     |     |     |    |     |     |     |    |
|---------|----------------------------------------------------|---------------------------------------------------------------|----------|-----|----|-----|-----|-----|----|-----|-----|-----|----|
| BG01548 | <i>α-Esterase-10 (α-Est10)</i>                     | In gene (intron)                                              | 84D8-D9  | ns  | ns | ns  | ns* | ns  | ▼  | ▲   | ns  | S*  | S* |
| BG01573 | <i>forkhead box, sub-group O (foxo)</i>            | 6418 bp at 5' side                                            | 88A5-A8  | ns  | ▼  | ▼   | ns  | ▼   | ▼* | ns  | ns* | ns  | S  |
| BG01672 | <i>SCAP / CG14591</i>                              | 113 bp at 5' side / 28 bp at 3' side                          | 42A8     | ns  | ▼  | ns  | ▼   | ns  | ns | ▲   | ns  | S   | S  |
| BG01683 | <i>CG32572</i>                                     | In gene (intron)                                              | 15A3     | ns  | ns | ns  | ns  | ns  | ▼  | ▲   | ns  | S*  | S  |
| BG01716 | <i>PAPS synthetase (Papss)</i>                     | 780 bp at 3' side                                             | 76D1-D2  | ns  | ns | ns  | ns  | ns  | ns | ▲   | ns  | ns* | S* |
| BG01726 | <i>CG11382</i>                                     | 197 bp at 5' side                                             | 1E4      | ns  | ns | ns* | ns  | ns* | ns | ▲*  | ns  | S   | S* |
| BG01735 | <i>CG13130 / big brain (bib)</i>                   | In genes (5'UTR)                                              | 30F5     | ns* | ns | ns* | ns  | ns* | ns | ▲   | ns  | S   | S  |
| BG01780 | <i>CG11226</i>                                     | In gene (exon)                                                | 80A4     | ns* | ns | ns  | ns  | ns  | ns | ▲   | ns  | S   | S  |
| BG01822 | <i>IGF-II mRNA-binding protein (Imp)</i>           | In gene (intron)                                              | 9F1-9F4  | ns  | ▼  | ns  | ▼   | ns  | ▼  | ns  | ns  | S   | S  |
| BG01902 | <i>Mastermind (mam)</i>                            | In gene (intron)                                              | 50C23-D3 | ns  | ns | ns  | ▼   | ns  | ns | ns* | ns  | S*  | S  |
| BG01912 | <i>Pxb</i>                                         | In gene (exon)                                                | 89A1-A2  | ns  | ▼  | ns* | ns  | ns  | ns | ▲*  | ns  | S   | S  |
| BG01990 | <i>CG43340</i>                                     | 61 bp at 5' side                                              | 43E6-E7  | ns  | ▼  | ns  | ▼*  | ns  | ▼  | ns  | ns  | ns  | S* |
| BG02042 | <i>easily shocked (eas)</i>                        | In gene (5'UTR)                                               | 14B7     | ns  | ns | ns  | ns* | ns  | ns | ▲   | ns  | ns  | S  |
| BG02088 | <i>CG15309</i>                                     | In gene (intron)                                              | 9B4      | ns  | ns | ns  | ▼   | ns  | ▼  | ns  | ns  | ns  | S* |
| BG02102 | <i>mir-313, 312, 311, 310 / mir-2498, 991, 992</i> | 69, 208, 369, 489 bp at 5' side / 380, 871, 985 bp at 3' side | 57A6     | ns  | ▼  | ns  | ns  | ns  | ▼  | ns  | ns  | ns  | S  |
| BG02106 | <i>CG31145</i>                                     | In gene (5'UTR)                                               | 95A4-A7  | ns  | ns | ns  | ns  | ns  | ▼  | ▲   | ns  | ns  | S* |
| BG02157 | <i>CG42268</i>                                     | 46 bp at 5' side                                              | 67C6     | ns* | ns | ns  | ns  | ns  | ns | ▲   | ns  | ns* | S  |

(Continued)

**Table 1 continued**

|         |                                                       |                    |           |     |    |     |    |     |     |     |     |     |    |
|---------|-------------------------------------------------------|--------------------|-----------|-----|----|-----|----|-----|-----|-----|-----|-----|----|
| BG02159 | <i>Death-associated protein kinase related (Drak)</i> | In gene (5'UTR)    | 10C1-C5   | ns* | ▼  | ns* | ▼  | ns  | ▼   | ns  | ns  | ns  | S  |
| BG02239 | <i>CG11550</i>                                        | 9536 bp at 5' side | 100D1     | ns* | ▼* | ns* | ▼* | ns* | ns* | ▲*  | ns  | S   | S  |
| BG02462 | <i>CG34460</i>                                        | 1317 bp at 3' side | 53D11     | ns* | ▼* | ▼*  | ▼* | ▼   | ▼   | ns  | ns  | S*  | S* |
| BG02563 | <i>Capricious (caps)</i>                              | In gene (5'UTR)    | 70A3-A4   | ns  | ns | ns  | ns | ns  | ns  | ▲   | ns  | ns* | ns |
| BG02690 | <i>CG14478</i>                                        | In gene (intron)   | 54B16     | ns* | ns | ns  | ▼* | ns  | ▼   | ns  | ns* | S*  | S* |
| BG02747 | <i>rutabaga (rut)</i>                                 | In gene (5'UTR)    | 12F4-F5   | ns  | ▼  | ▼   | ▼  | ▼   | ns  | ns  | ns  | S   | S  |
| BG02823 | <i>scylla (scyl)</i>                                  | 546 bp at 5' side  | 68B4-68C1 | ns  | ▼  | ns  | ▼  | ns  | ▼   | ▲   | ns  | S   | S  |
| BG02830 | <i>Lipid storage droplet-2 (Lsd-2)</i>                | 379 bp at 5' side  | 13A8-A9   | ns  | ▼* | ns* | ▼* | ▼*  | ▼*  | ns* | ns* | S*  | S* |

The candidate gene, the site of the mutation and its morphological effect are shown. ns: not significant. For body size related traits, ▼ and ▲ represent significant decrements and increments with respect to the control respectively ( $p < 0.05$ ). For wing shape, S represents significant differences with respect to the control ( $p < P_{\text{Bonferroni}} = 0.0012$ ). \* Significant at 25°C [12, 13].
